# Supplementary material for: Hydrothermal synthesis and structures of three new copper complexes: [{Cu(2,2′-bipy}2(β-Mo8O26)], [{Cu(py)3}2{Cu(py)2}2(α-Mo8O26)] and [Cu(py)2]4[(SO4)Mo12O36]Electronic supplementary information (ESl) available: ESR spectra of 1 and 3, IR spectra of 1–3. See http://www.rsc.org/suppdata/dt/b1/b111480h/
Source: Royal Society of Chemistry journal article supplement (doi:10.1039/b111480h), 2002-06-20
Supplement: b111480h.pdf [file b111480h.pdf]

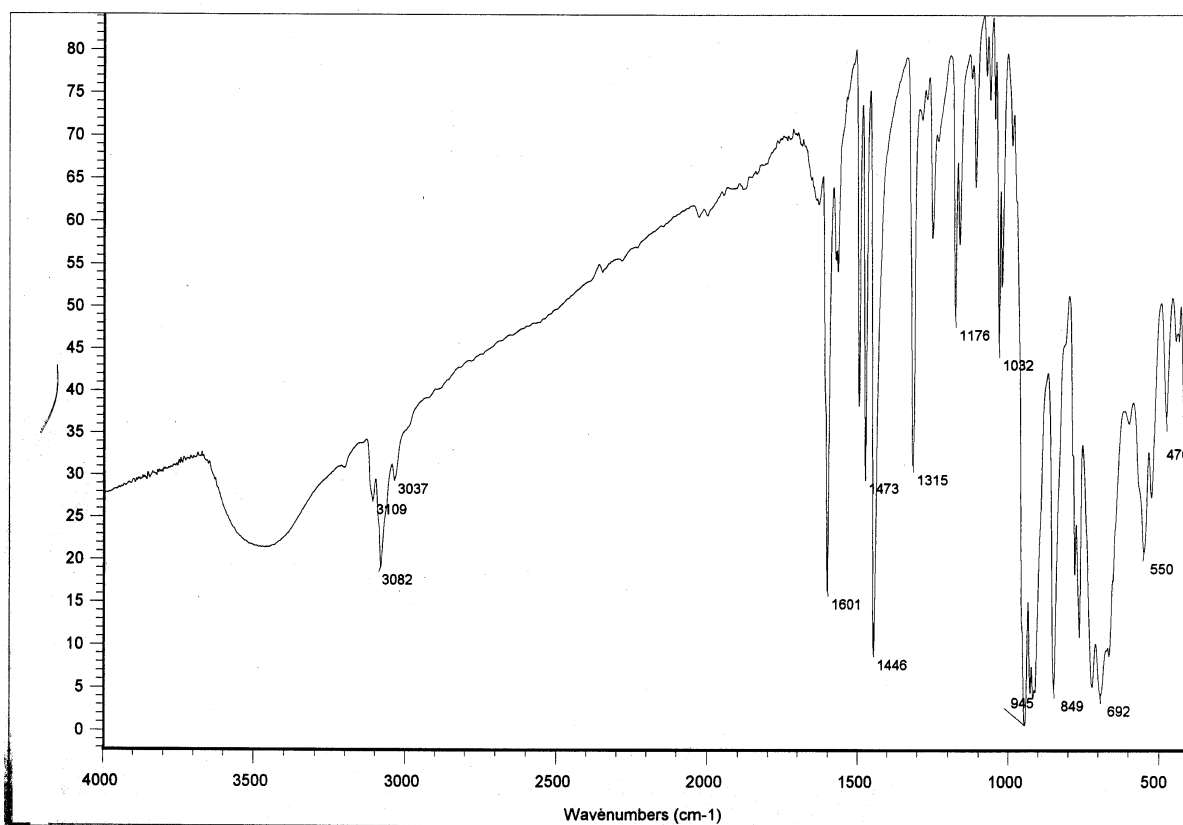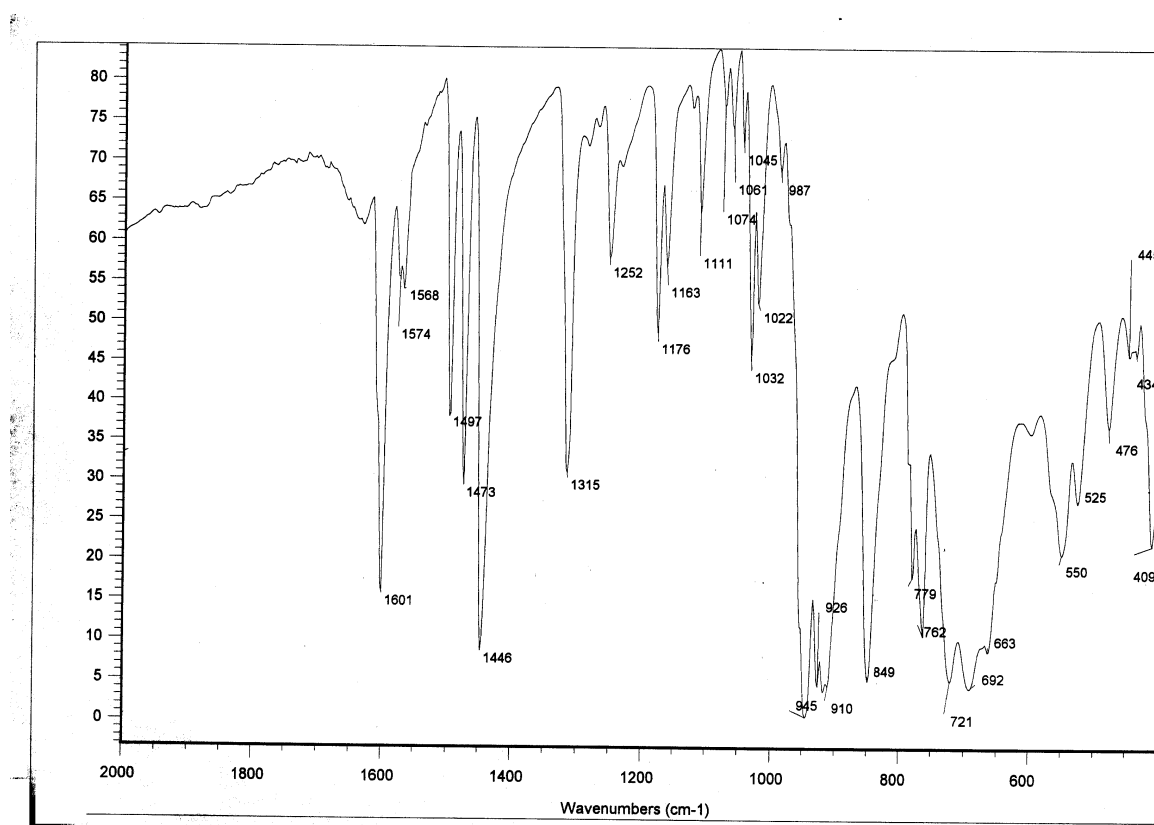

Fig. 1 IR spectra of  $[\{\text{Cu}(2,2'\text{-bipy})_2\}_2(\beta\text{-Mo}_8\text{O}_{26})]$  (**1**)

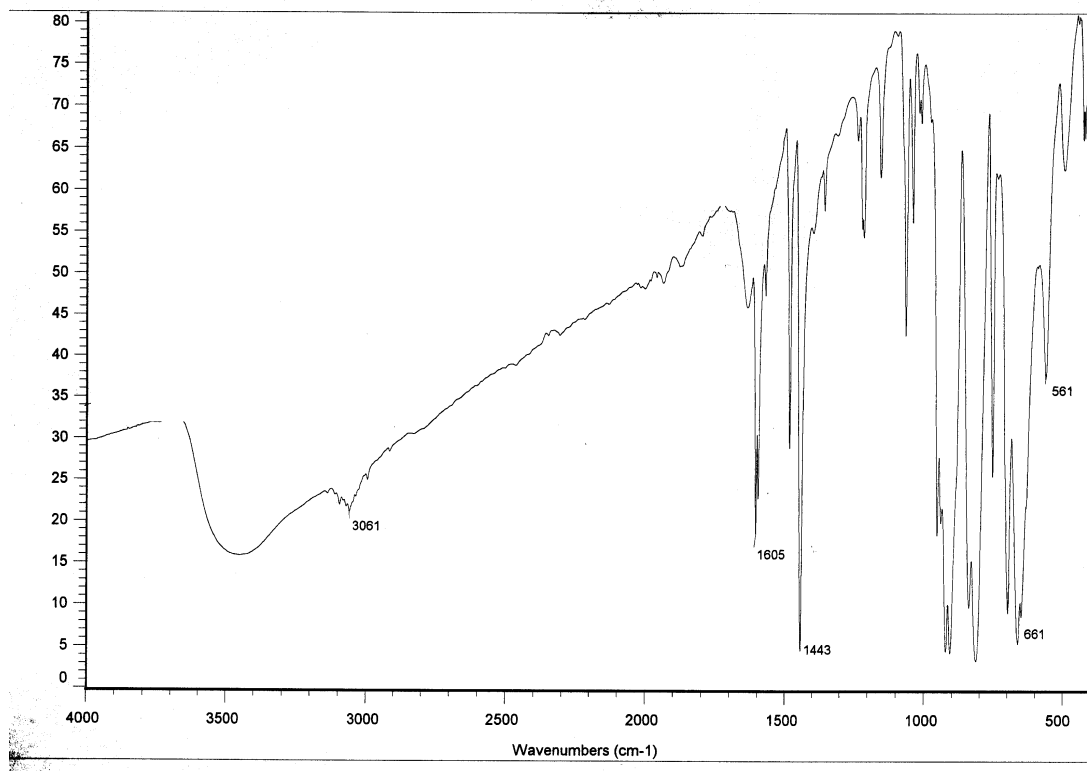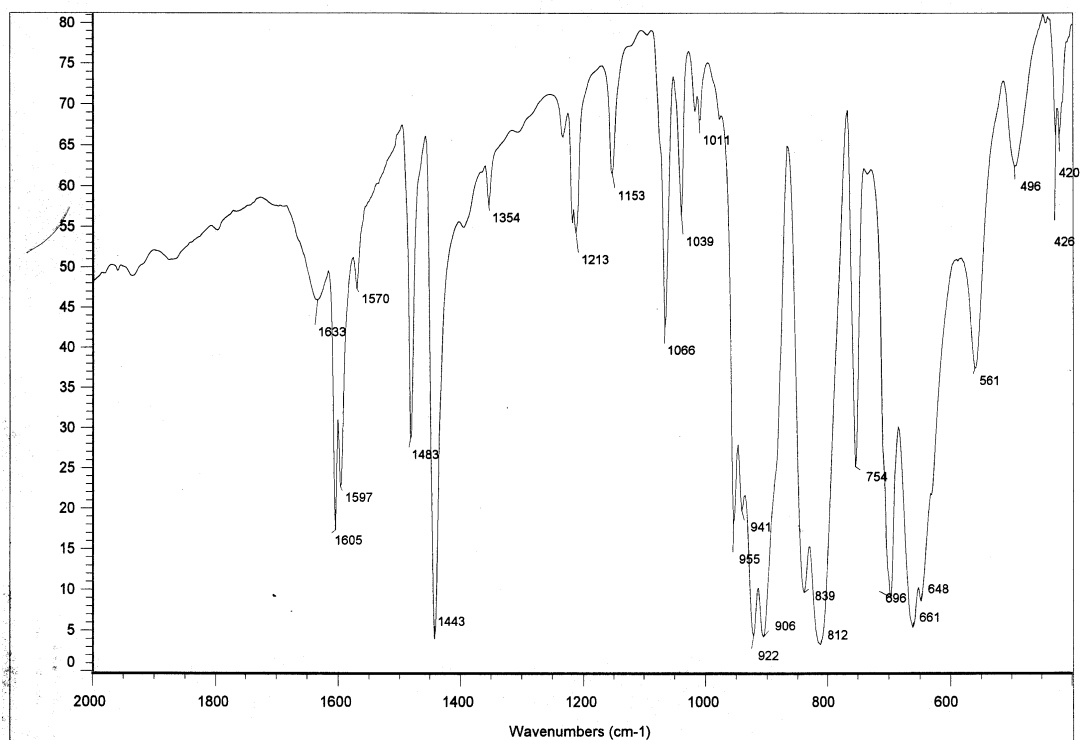

Fig. 2 IR spectra of  $[\{\text{Cu}(\text{py})_3\}_2\{\text{Cu}(\text{py})_2\}_2(\alpha\text{-Mo}_8\text{O}_{26})]$  (2)

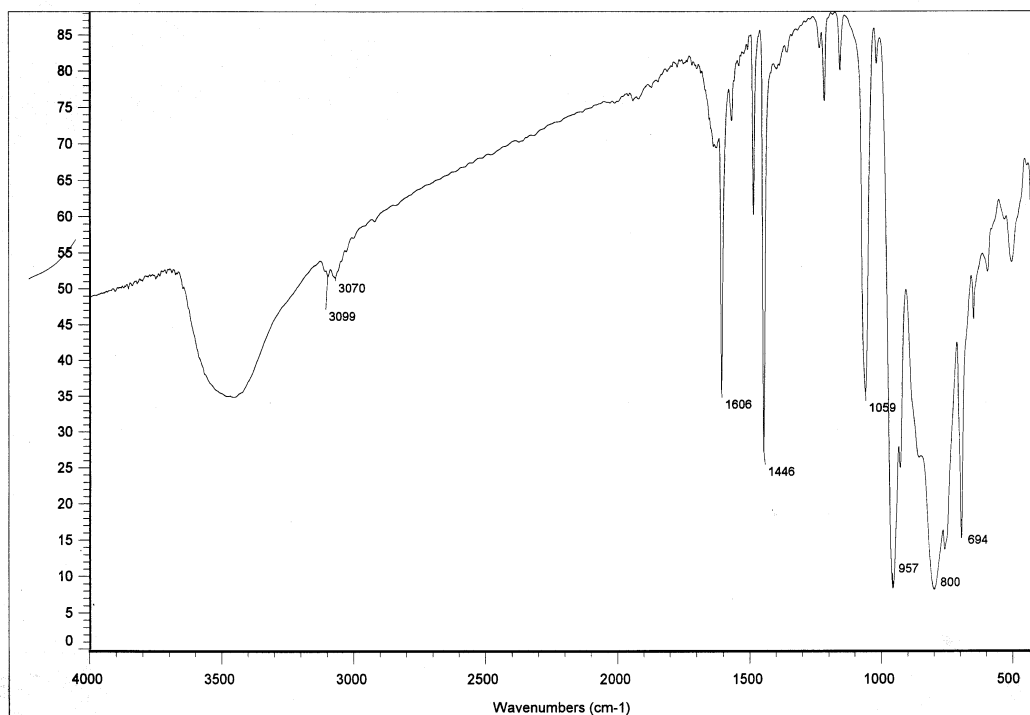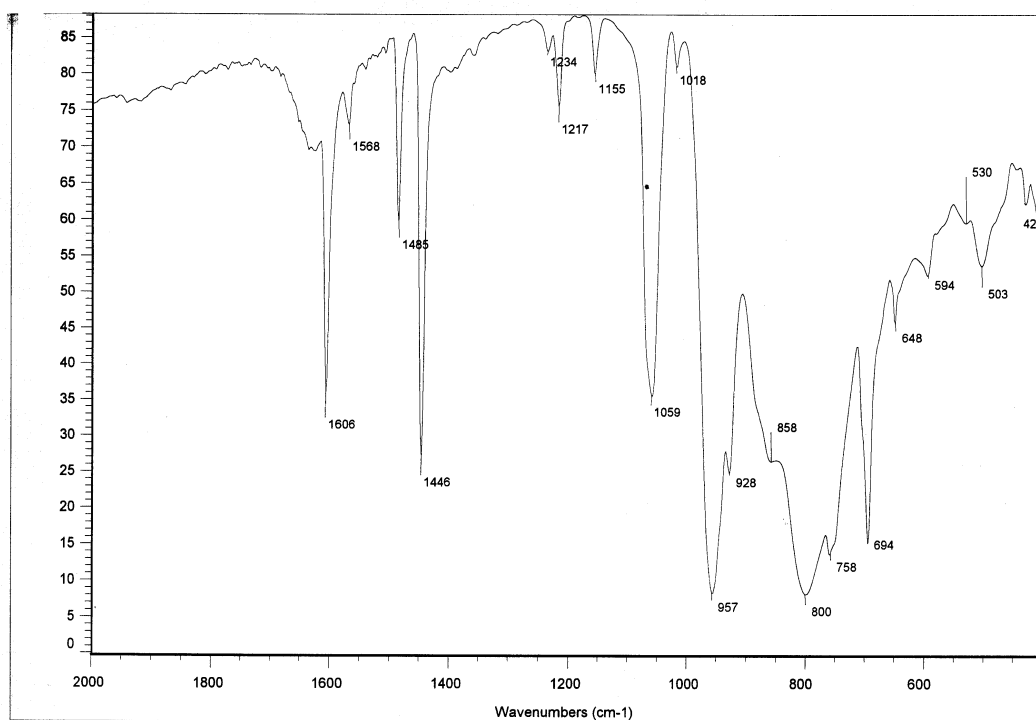

Fig. 3 IR spectra of  $[\text{Cu}(\text{py})_2]_4[(\text{SO}_4)\text{Mo}_{12}\text{O}_{36}]$  (3)

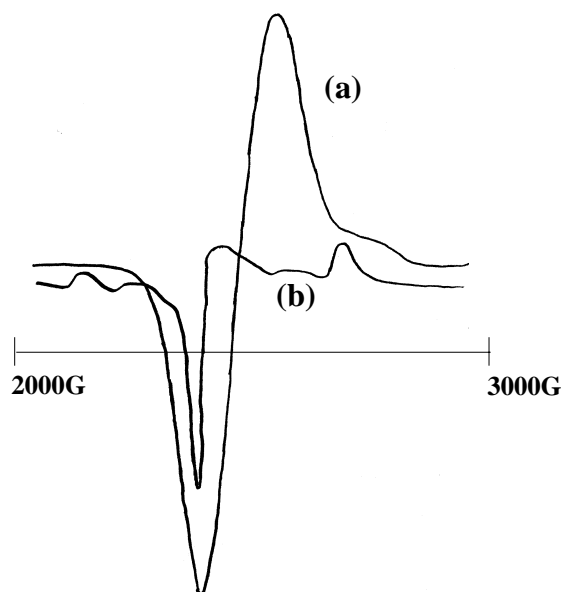

Fig. 1 ESR spectra of **1** (a) and **3** (b).
